# Supplementary material
Source: publisher figshare collection journal article supplement (https://gsajournals.figshare.com/articles/dataset/_/12284324)
Supplement: Supplementary file 2 [file 1]

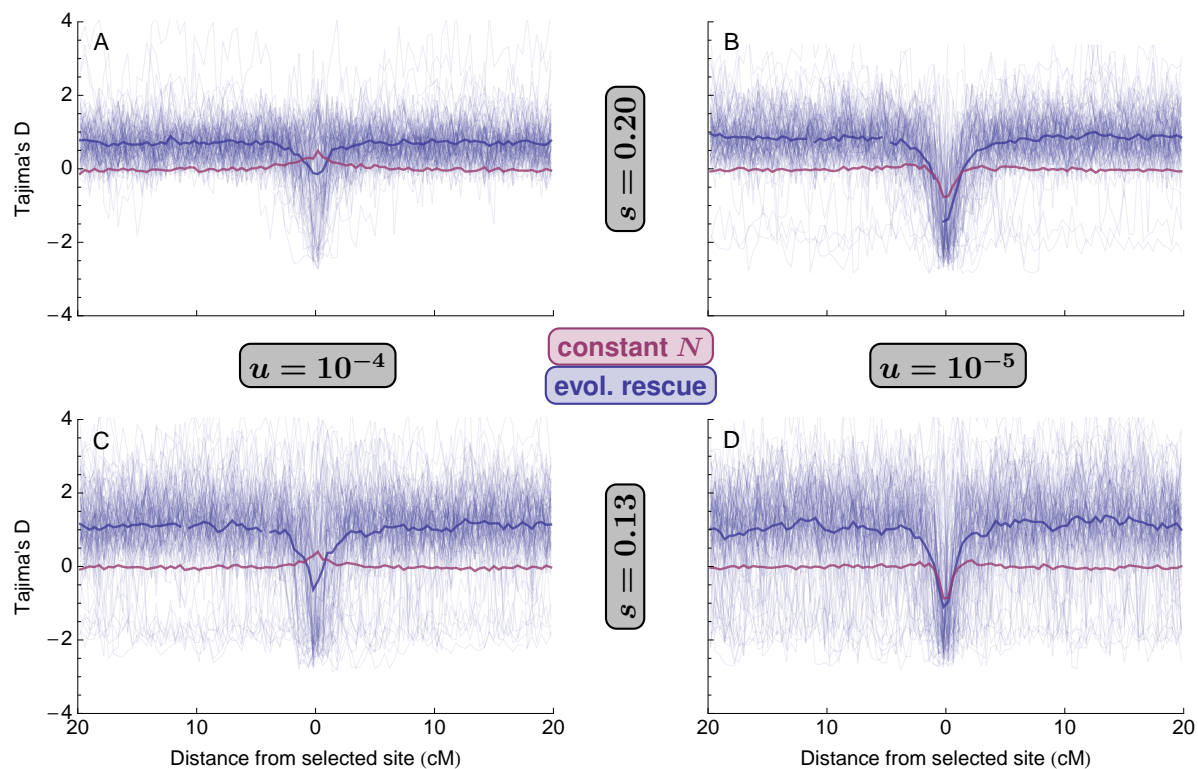

**Figure S5:** Tajima's  $D$  after a selective sweep from *de novo* mutation during evolutionary rescue (blue;  $d = 0.05$ ) or in a population of roughly constant size (red;  $d = 0$ ). Thin curves show 100 replicate simulations (rescue only for clarity) and thicker curves show simulation means. Parameters:  $N(0) = 10^4$ .
