# Supplementary material
Source: publisher figshare collection journal article supplement (https://gsajournals.figshare.com/articles/dataset/_/12284324)
Supplement: Supplementary file 3 [file 1]

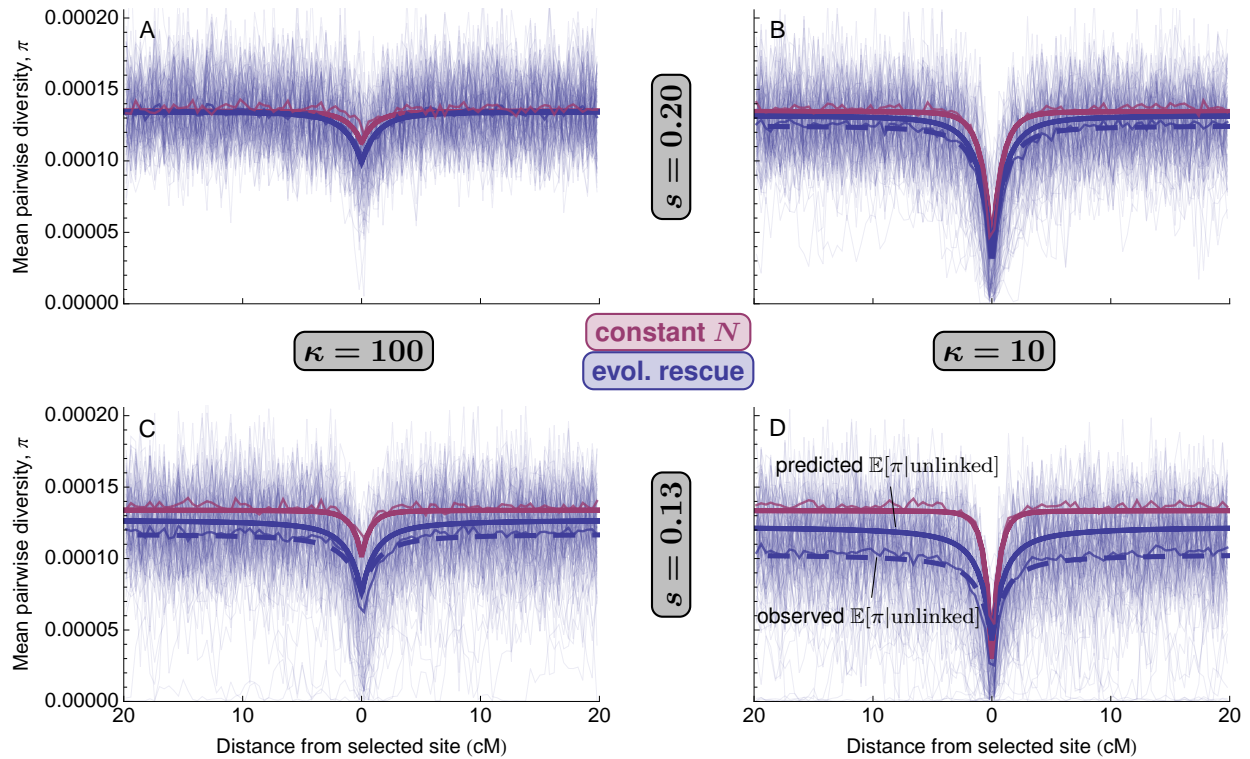

**Figure S1:** Mean pairwise diversity,  $\pi$ , after a selective sweep from standing genetic variation in evolutionary rescue (blue;  $d = 0.05$ ) or in a population of roughly constant size (red;  $d = 0$ ). The thick solid curves are our approximations (Equation 9). The dashed blue curves replace  $\mathbb{E}[\pi|unlinked]$  with the observed genome-wide average  $\pi$  (excluding sites within 5cM of the selected site as we simulate only a portion of a genome). The thinnest curves are 100 replicate simulations (rescue only for clarity) and the slightly thicker curves are simulation means (often obscured by prediction). Parameters:  $N(0) = 10^4$ .
