# Supplementary material
Source: publisher figshare collection journal article supplement (https://gsajournals.figshare.com/articles/dataset/_/12284324)
Supplement: Supplementary file 4 [file 1]

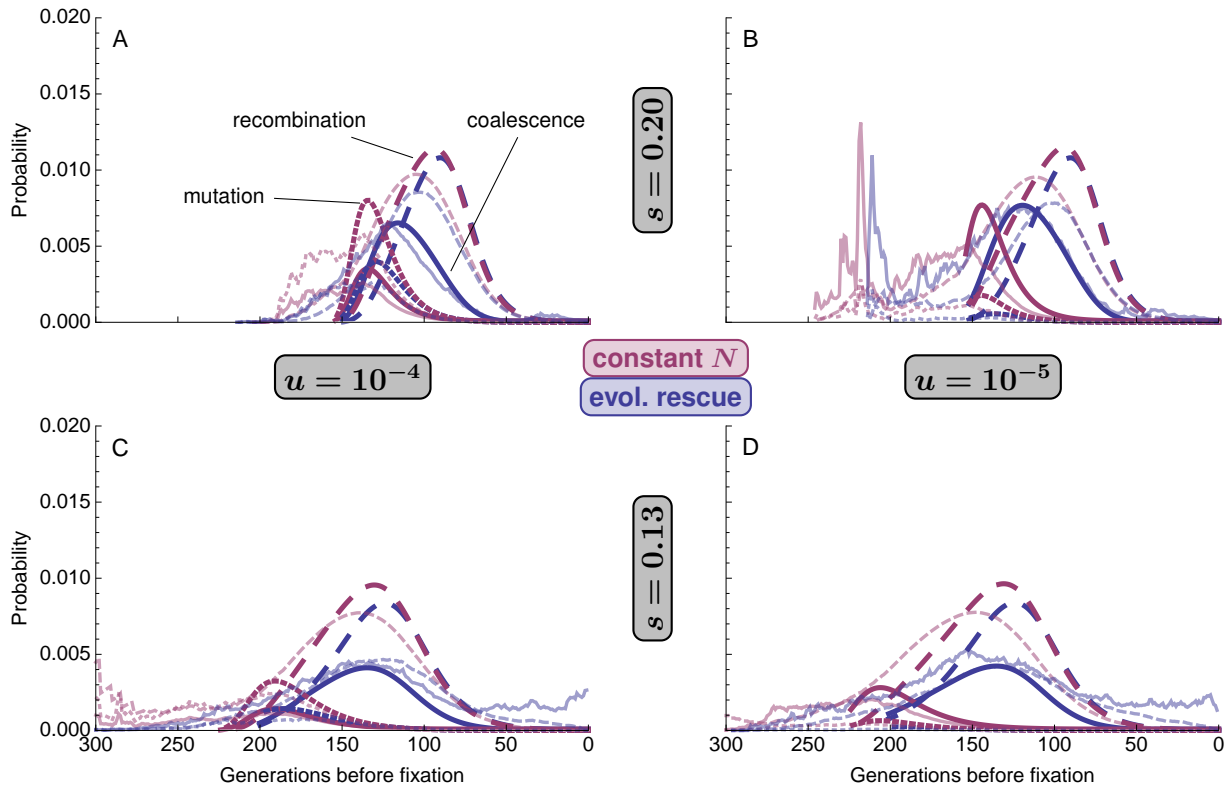

**Figure S3:** The timing of events in the structured coalescent (Equation 7) for a sample of size  $k = 2$  at a linked neutral locus ( $r = 0.01$ ) during a selective sweep from *de novo* mutation in evolutionary rescue (blue;  $d = 0.05$ ) or in a population of roughly constant size (red;  $d = 0$ ). Thicker opaque curves use the analytic expressions for allele frequency and population size (Equation 5) while the thinner transparent curves show the mean probabilities given the observed allele frequency and population size dynamics in 100 replicate simulations (these become more variable in the past as less replicates remain polymorphic).
